# Supplementary material for: Drug–Drug Interactions with Oral Anticoagulants as Potentially Inappropriate Medications: Prevalence and Outcomes in Elderly Patients in Primary Care and Hospital Settings
Source: MDPI journal article supplement (doi:10.3390/pharmaceutics14071410), 2022-07-05
Supplement: s1 [file s1]

**Table S1:** ICD-10 diagnoses codes used to detect bleeding ADE at hospital admission

|                             | ICD10 | Bleeding adverse event                                                             |
|-----------------------------|-------|------------------------------------------------------------------------------------|
| Other bleedings             | D50.0 | Iron deficiency anaemia secondary to blood loss                                    |
|                             | D62   | Acute posthaemorrhagic anaemia                                                     |
|                             | H11.3 | Conjunctival haemorrhage                                                           |
|                             | H21.0 | Hyphaema                                                                           |
|                             | H35.6 | Retinal haemorrhage                                                                |
|                             | H43.1 | Vitreous haemorrhage                                                               |
|                             | M25.0 | Haemarthrosis                                                                      |
|                             | R04.0 | Epistaxis                                                                          |
|                             | R23.3 | Spontaneous ecchymoses                                                             |
|                             | R58   | Haemorrhage, not elsewhere classified                                              |
|                             | T45.5 | Poisoning by, adverse effect of and underdosing of anticoagulants                  |
|                             | Y44.2 | Adverse effects in therapeutic use: anticoagulants                                 |
| Gastro intestinal bleedings | K06.8 | Other specified disorders of gingiva and edentulous alveolar ridge                 |
|                             | K25.0 | Gastric ulcer : acute with haemorrhage                                             |
|                             | K25.2 | Gastric ulcer : acute with both haemorrhage and perforation                        |
|                             | K25.4 | Gastric ulcer : chronic or unspecified with haemorrhage                            |
|                             | K25.6 | Gastric ulcer : chronic or unspecified with both haemorrhage and perforation       |
|                             | K26.0 | Duodenal ulcer : acute with haemorrhage                                            |
|                             | K26.2 | Duodenal ulcer : acute with both haemorrhage and perforation                       |
|                             | K26.4 | Duodenal ulcer : chronic or unspecified with haemorrhage                           |
|                             | K26.6 | Duodenal ulcer : chronic or unspecified with both haemorrhage and perforation      |
|                             | K27.0 | Peptic ulcer : acute with haemorrhage                                              |
|                             | K27.2 | Peptic ulcer : acute with both haemorrhage and perforation                         |
|                             | K27.4 | Peptic ulcer : chronic or unspecified with haemorrhage                             |
|                             | K27.6 | Peptic ulcer : chronic or unspecified with both haemorrhage and perforation        |
|                             | K28.0 | Gastrojejunal ulcer : acute with haemorrhage                                       |
|                             | K28.2 | Gastrojejunal ulcer : acute with both haemorrhage and perforation                  |
|                             | K28.4 | Gastrojejunal ulcer : chronic or unspecified with haemorrhage                      |
|                             | K28.6 | Gastrojejunal ulcer : chronic or unspecified with both haemorrhage and perforation |

|                        |       |                                                                |
|------------------------|-------|----------------------------------------------------------------|
|                        | K29.0 | Acute haemorrhagic gastritis                                   |
|                        | K92.2 | Gastrointestinal haemorrhage unspecified                       |
|                        | K62.5 | Haemorrhage of anus and rectum                                 |
|                        | K66.1 | Haemoperitoneum (excl. Traumatic haemoperitoneum)              |
|                        | K92.0 | Haematemesis                                                   |
|                        | K92.1 | Melaena                                                        |
|                        | R04.1 | Haemorrhage from throat                                        |
|                        |       |                                                                |
| Intracranial bleedings | I60   | Subarachnoid haemorrhage                                       |
|                        | I60.0 | Subarachnoid haemorrhage from carotid siphon and bifurcation   |
|                        | I60.1 | Subarachnoid haemorrhage from middle cerebral artery           |
|                        | I60.2 | Subarachnoid haemorrhage from anterior communicating artery    |
|                        | I60.3 | Subarachnoid haemorrhage from posterior communicating artery   |
|                        | I60.4 | Subarachnoid haemorrhage from basilar artery                   |
|                        | I60.5 | Subarachnoid haemorrhage from vertebral artery                 |
|                        | I60.6 | Subarachnoid haemorrhage from other intracranial arteries      |
|                        | I60.7 | Subarachnoid haemorrhage from intracranial artery, unspecified |
|                        | I60.8 | Other subarachnoid haemorrhage                                 |
|                        | I60.9 | Subarachnoid haemorrhage, unspecified                          |
|                        | I61   | Intracerebral haemorrhage                                      |
|                        | I61.0 | Intracerebral haemorrhage in hemisphere, subcortical           |
|                        | I61.1 | Intracerebral haemorrhage in hemisphere, cortical              |
|                        | I61.2 | Intracerebral haemorrhage in hemisphere, unspecified           |
|                        | I61.3 | Intracerebral haemorrhage in brain stem                        |
|                        | I61.4 | Intracerebral haemorrhage in cerebellum                        |
|                        | I61.5 | Intracerebral haemorrhage, intraventricular                    |
|                        | I61.6 | Intracerebral haemorrhage, multiple localized                  |
|                        | I61.8 | Other intracerebral haemorrhage                                |
|                        | I61.9 | Intracerebral haemorrhage, unspecified                         |
|                        | I62   | Other nontraumatic intracranial haemorrhage                    |
|                        | I62.0 | Nontraumatic subdural haemorrhage                              |
|                        | I62.1 | Nontraumatic extradural haemorrhage                            |
|                        | I62.9 | Intracranial haemorrhage (nontraumatic), unspecified           |
|                        |       |                                                                |

|                         |       |                                                      |
|-------------------------|-------|------------------------------------------------------|
| Respiratory bleedings   | R04.2 | Haemoptysis                                          |
|                         | R04.8 | Haemorrhage from other sites in respiratory passages |
|                         | R04.9 | Haemorrhage from respiratory passages, unspecified   |
|                         |       |                                                      |
| Genitourinary bleedings | I31.2 | Haemopericardium, not elsewhere classified           |
|                         | N93.9 | Abnormal uterine and vaginal bleeding, unspecified   |
|                         | R31   | Unspecified haematuria                               |
|                         |       |                                                      |
